# Supplementary material for: A new fluorescent oxaliplatin(iv) complex with EGFR-inhibiting properties for the treatment of drug-resistant cancer cells
Source: PubMed Central journal article supplement (PMC11715172; doi:10.1039/d4qi03025g), 2025-01-09
Supplement: QI-012-D4QI03025G-s001.pdf [file QI-012-D4QI03025G-s001.pdf]

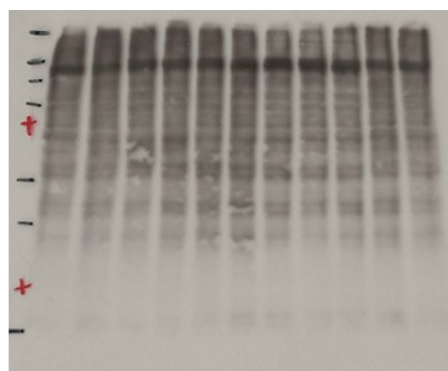

EGFR

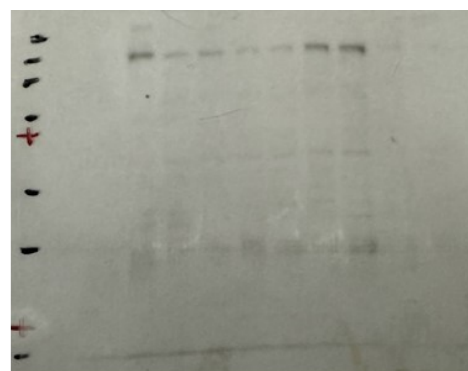

p- EGFR

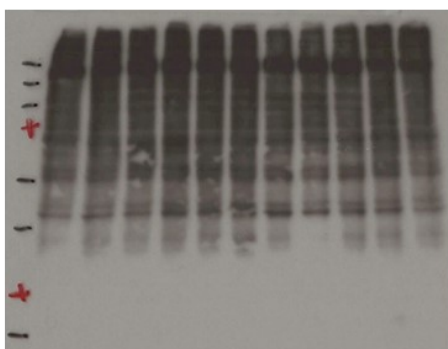

ERK 1/2

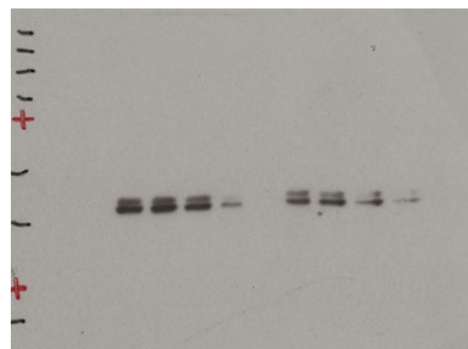

p- ERK 1/2

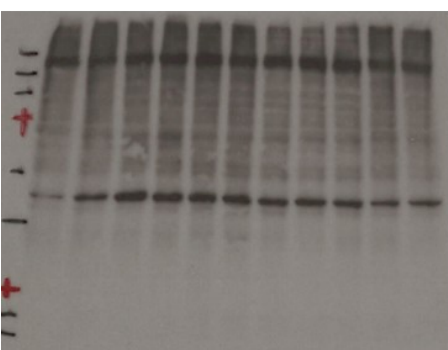

$\beta$  - Actin

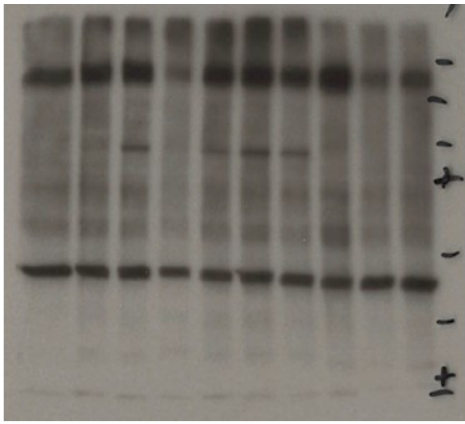

EGFR

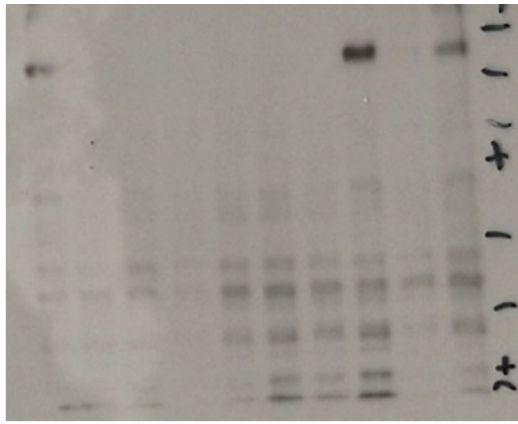

p- EGFR

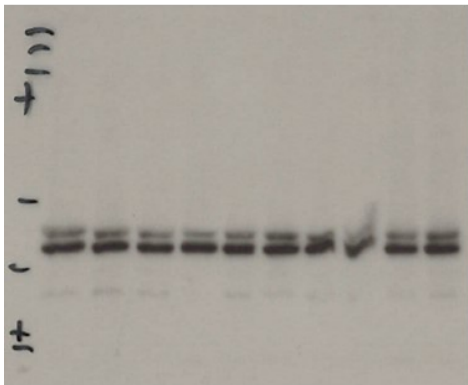

ERK 1/2

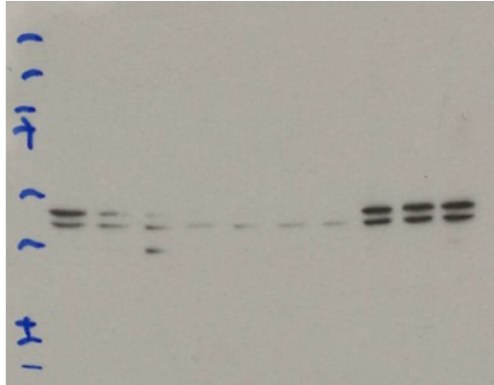

p- ERK 1/2

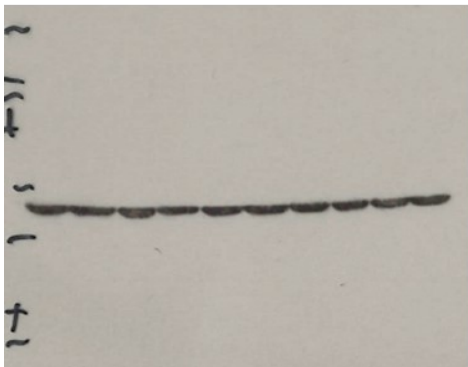

$\beta$  - Actin

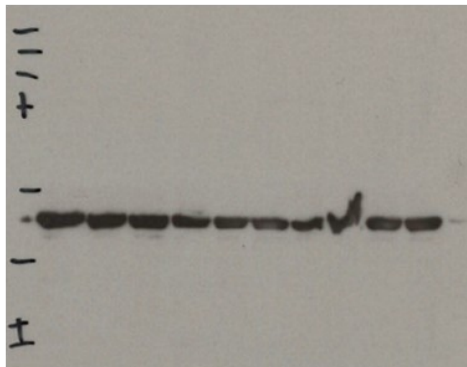

$\beta$  - Actin

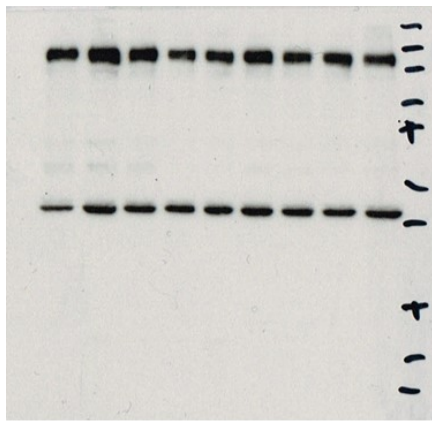

EGFR

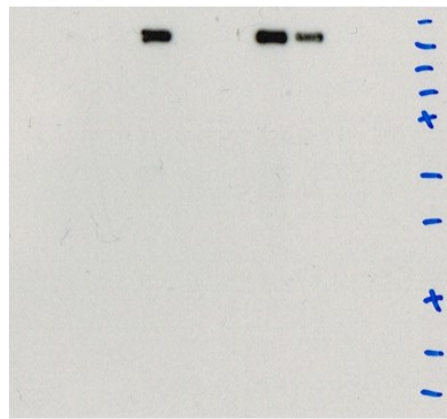

p-EGFR

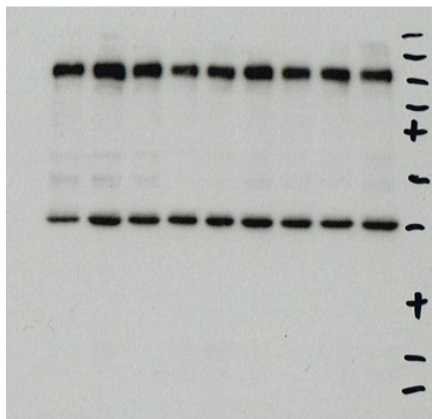

ERK 1/2

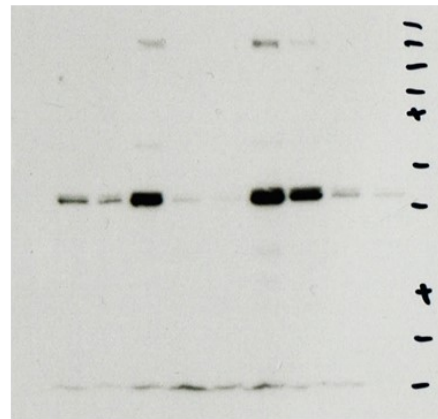

p-ERK 1/2

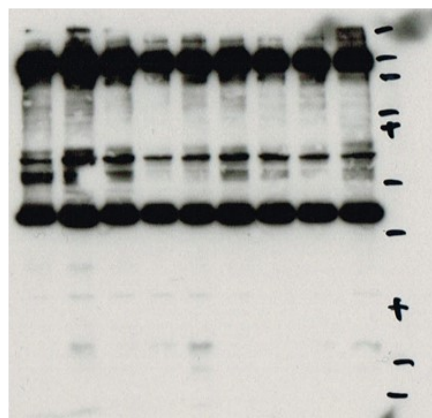

AKT

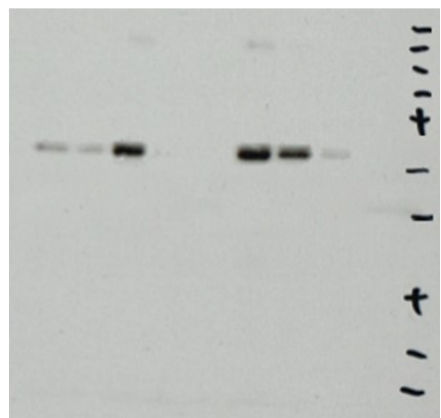

p-AKT

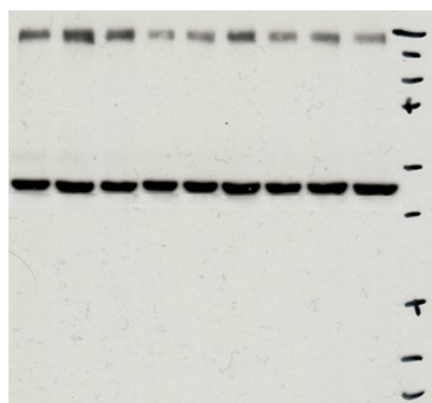

$\beta$  - Actin
